# Supplementary material
Source: publisher figshare collection journal article supplement (https://gsajournals.figshare.com/ndownloader/files/17710703)
Supplement: Supplementary file 1 [file 17710703]

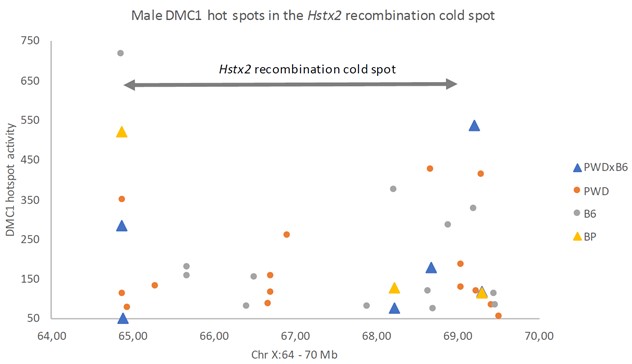


**Figure S1 Activity of male DMC1 hotspots in the *Hstx2* recombination cold spot.** The activity of DMC1 hotspots in the *Hstx2* region of the (PWD x B6) F1 and (B6 x PWD)F1 hybrid males was suppressed compared to PWD and B6 strains. Data extracted from (DAVIES et al. 2016); visualized are hotspots with activity > 50.
